# Supplementary material for: Identification of an RNA Silencing Suppressor Encoded by a Symptomless Fungal Hypovirus, Cryphonectria Hypovirus 4
Source: MDPI journal article supplement (doi:10.3390/biology10020100), 2021-01-31
Supplement: s1 [file s1]

**Supplementary Data for**

**Identification of an RNA silencing suppressor encoded by a symptomless fungal hypovirus, Cryphonectria hypovirus 4**

Annisa Aulia<sup>a, b</sup>, Kiwamu Hyodo<sup>a</sup>, Sakae Hisano<sup>a</sup>, Hideki Kondo<sup>a</sup>, Bradley I. Hillman<sup>c</sup>,  
and Nobuhiro Suzuki<sup>a</sup>

<sup>a</sup> Institute of Plant Science and Resources (IPSR), Okayama University, Kurashiki, 710-0046 Japan

<sup>b</sup> Graduate School of Environmental and Life Science, Okayama University, Okayama, 700-8530 Japan

<sup>c</sup> Plant Biology and Pathology, Rutgers University, New Brunswick, NJ 08901, USA

Running title: CHV4 RNA silencing suppressor

Corresponding author:

Nobuhiro Suzuki

e-mail: [nsuzuki@okayama.u-ac.jp](mailto:nsuzuki@okayama.u-ac.jp)

Tel. +82(086) 434-1230

Fax. +82(086) 434-1232

**Fig. S1.** CHV4-mediated suppression of the GFP reporter induction. The reporter fungal strain with pCPX-C18-*dcl2*pro-eGFP (C18/*dcl2*pro-eGFP) was singly or dually infected by CHV1- $\Delta$ p69 and MyRV2 (B), or CHV4. A different set of fungal strains than the ones shown in Figure 1B were used. Values in the respective panels show relative intensity of the reporter eGFP green fluorescence quantified by ImageJ, with the CHV1- $\Delta$ p69-infected strain expressed as 100.

**Fig. S2.** The 5'-terminal nucleotide profile of viral-derived small RNA (15- to 32 nt) of *C. parasitica* C18 strain in either singly or doubly infected by CHV4-C18 and MyRV2. Red, dark yellow, blue and green regions show small RNAs with 5'-terminal nucleotides U, G, C, and A, respectively.

**Fig. S3.** Quantitative analyses of *dcl2* or MyRV2 S4 mRNA in C18 transformed by the empty vector and p24 coding domain. different fungal strains. Bar graphs show the relative accumulation levels (mean  $\pm$  SD,  $n = 2$ ) of *dcl2* mRNA or MyRV2 S10 mRNA was quantified by RT-qPCR. Tested fungal strains included C18 transformants with the empty vector (C18emp) and p24 coding domain (C18p24) that were uninfected (virus free) or infected by MyRV2. In RT-qPCR, glyceraldehyde-3-phosphate dehydrogenase gene (*gpd*) mRNA was used as an internal control. The primers used are: MyRV2 S4 F3 (5'-ACGCGCTTCTGTGATGAATG-3') and MyRV2 S4 R3 (5'-ATCTGTGCGCAACAACGGATG-3') for MyRV S4 mRNA, DCL2 F3 (5'-ACGCGAAATCACATCTGCAG-3') and DCL2 R3 (5'-AGCAACACGGTAGCTTTTCAG-3') for *dcl2* mRNA, and DCL2 F3 (5'-AAGGGGCAGCGAAGAAAAAG-3') and DCL2 R3 (5'-ACGTAGCTAACTACCACTGCAC-3') for *gpd* mRNA. The mean value for MyRV2 C18 wt was set to 100.

**Fig. S4.** Quantification of *dcl2* or MyRV2 S10 mRNA in different fungal strains. Bar graphs show the relative accumulation levels (mean  $\pm$  SD,  $n = 2-5$ ) of *dcl2* or MyRV2 S10 mRNA based on the northern blotting data shown in Figure 4. Tested fungal strains included C18p24 and C18 wt uninfected or infected by MyRV2 alone or together with CHV4-C18. The mean value for MyRV2 C18 wt was set to 100. Different letters indicate significant differences ( $P < 0.05$ ), by one-way analysis of variance (ANOVA) followed

by Tukey's honestly significant difference (HSD) test. Statistical analyses were conducted with the open source software OpenStat (<http://statpages.info/miller/OpenStatMain.htm>).

Fig. S1

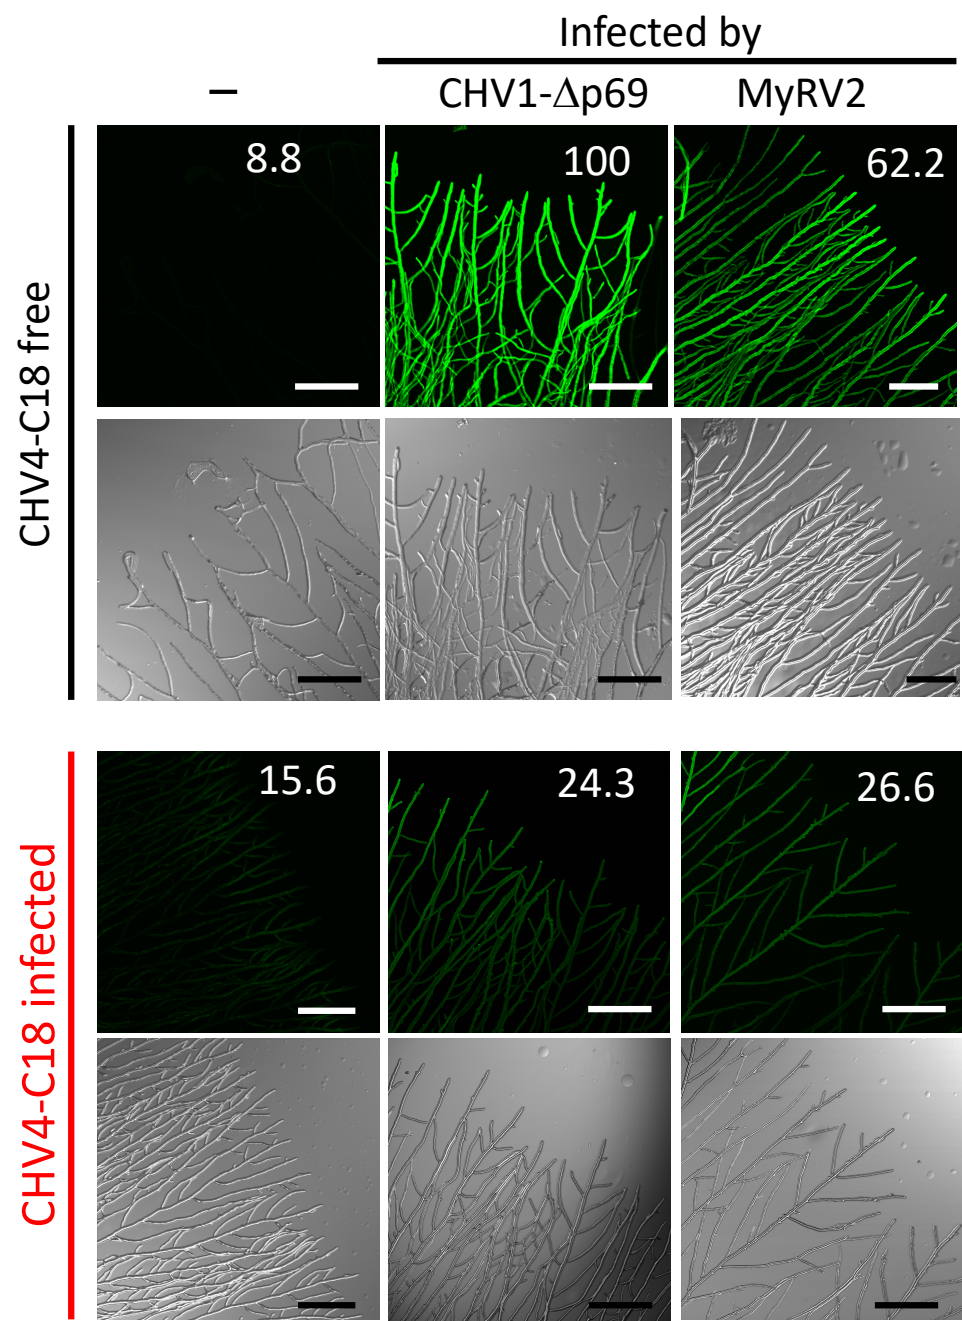

Fig. S2

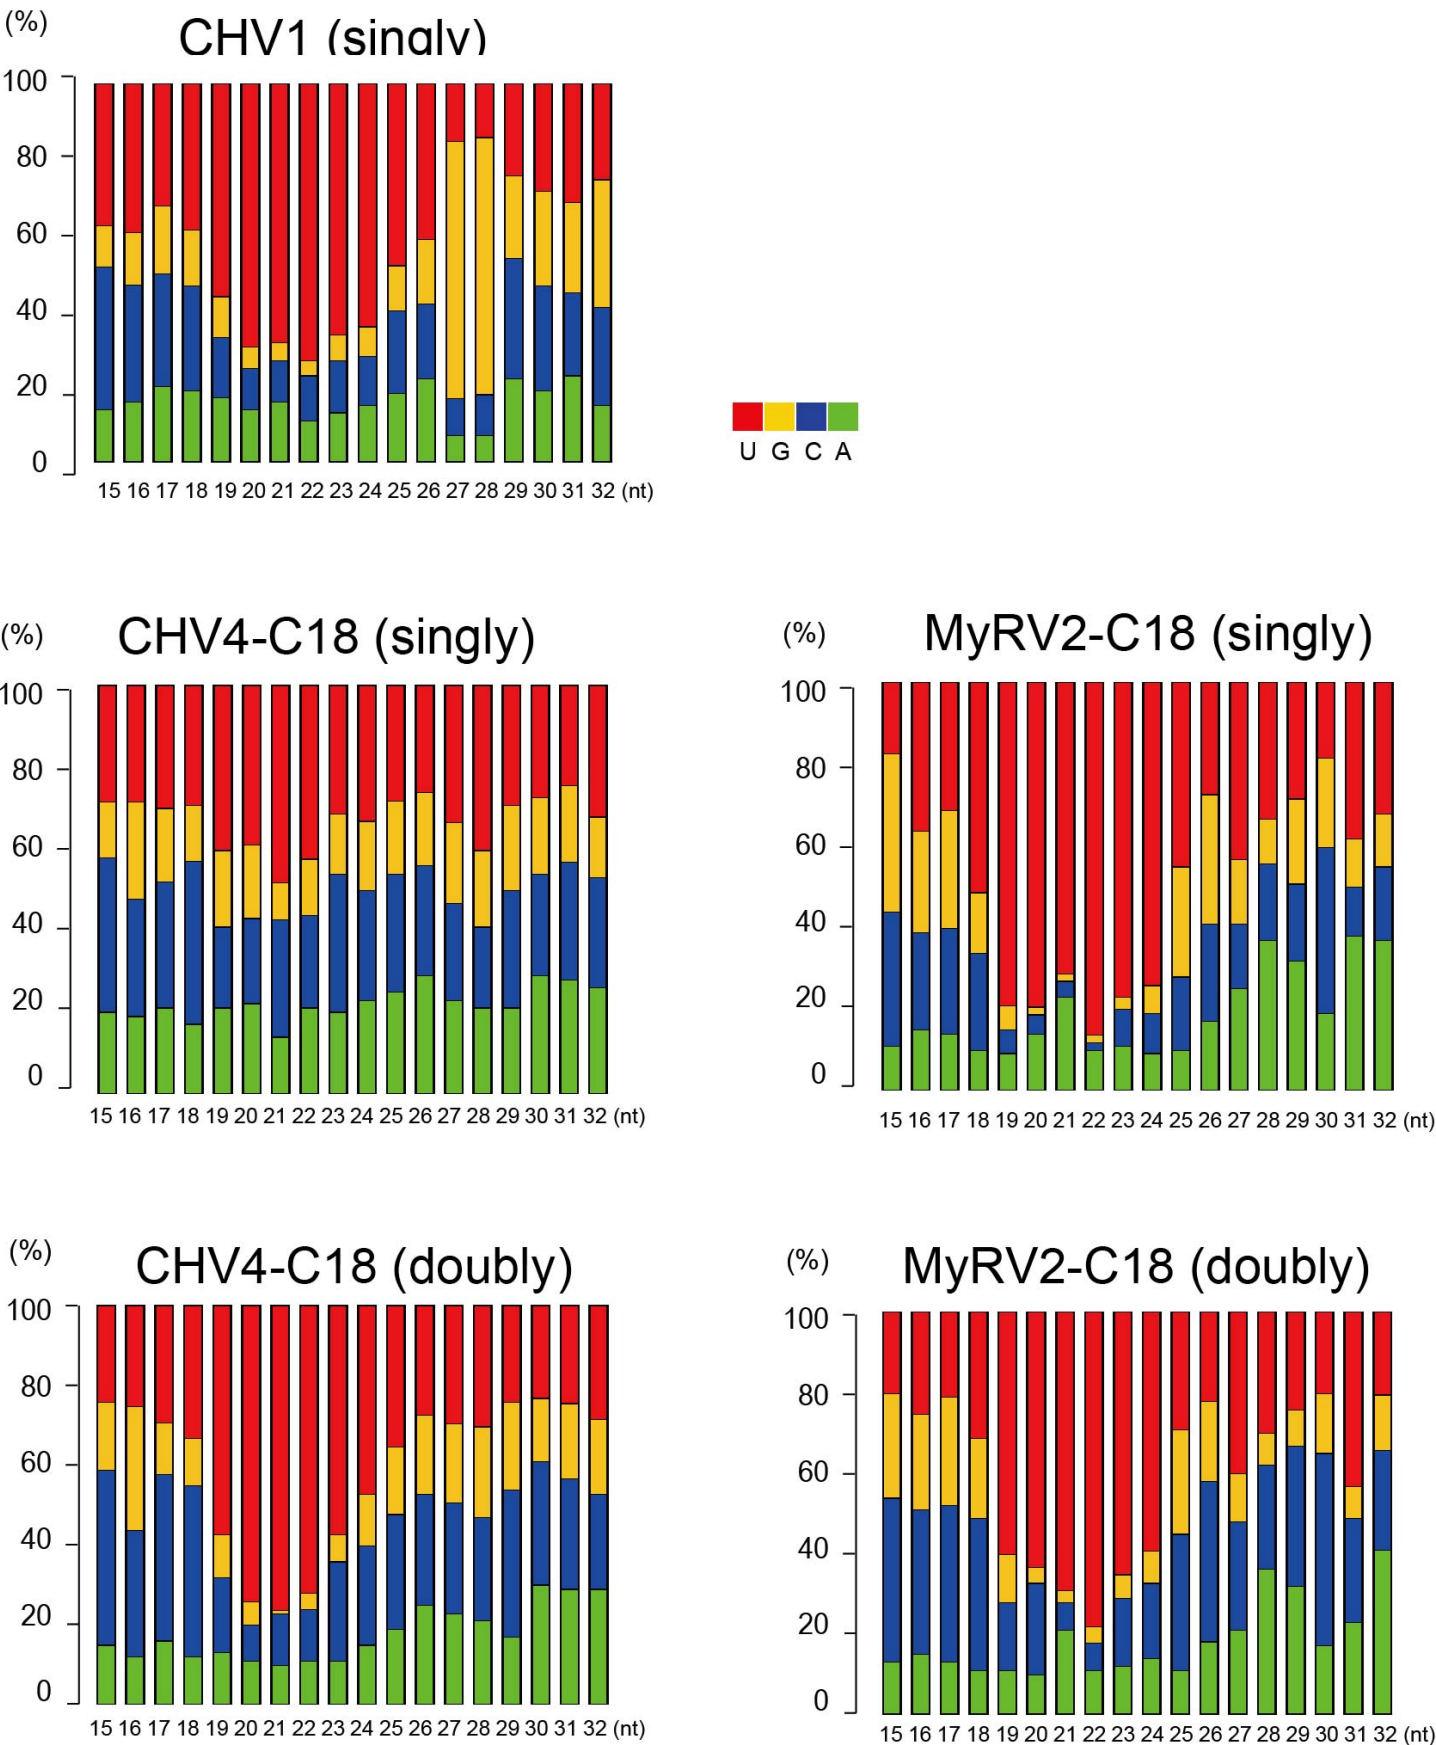

Fig. S3

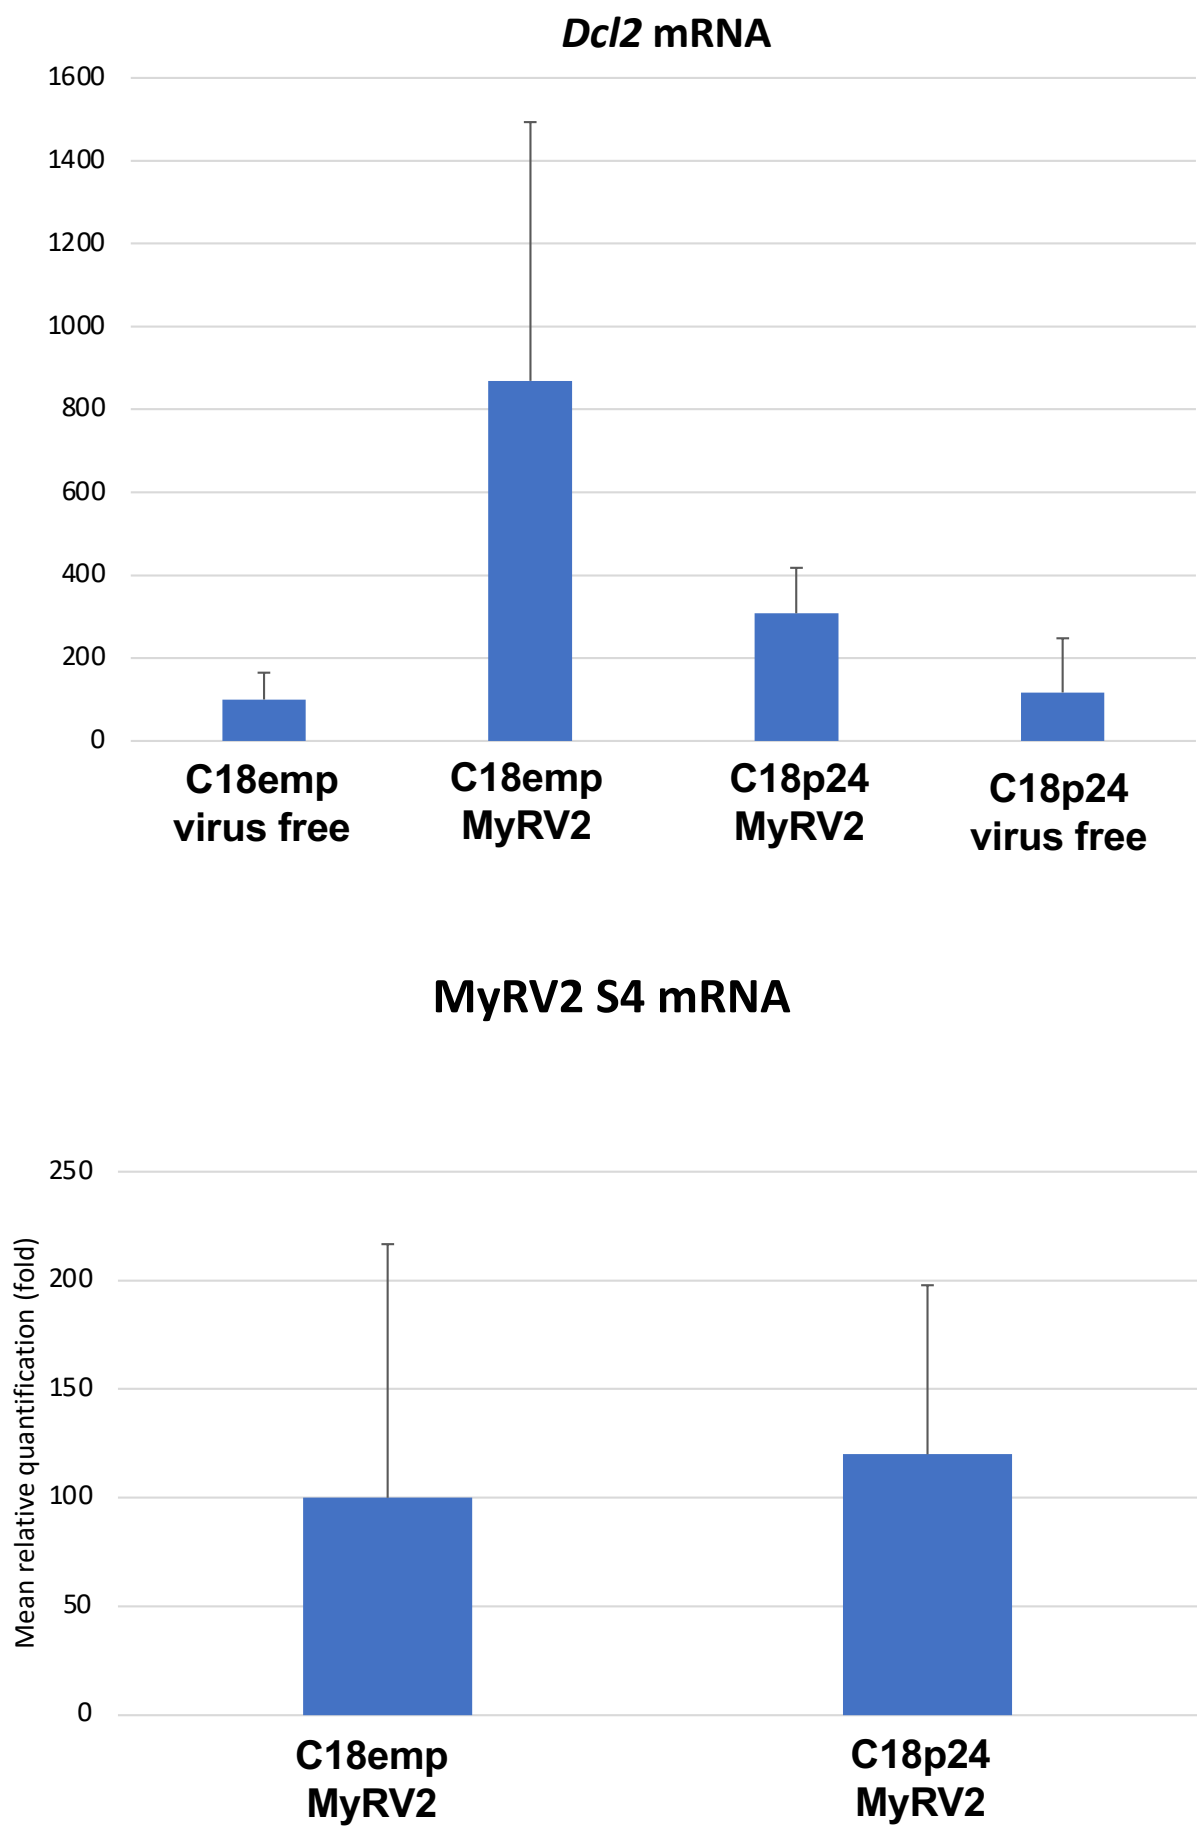

Fig. S4

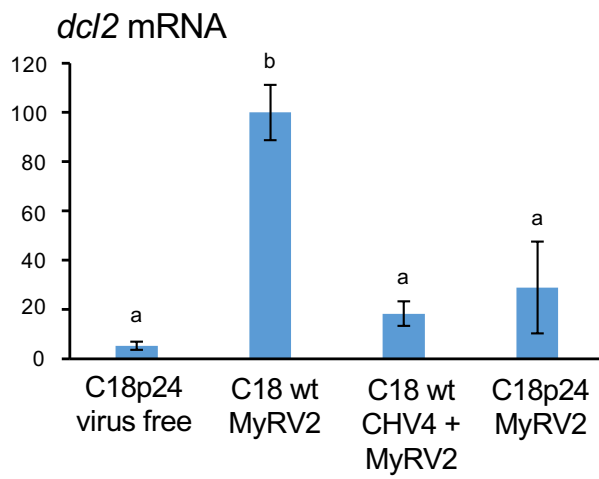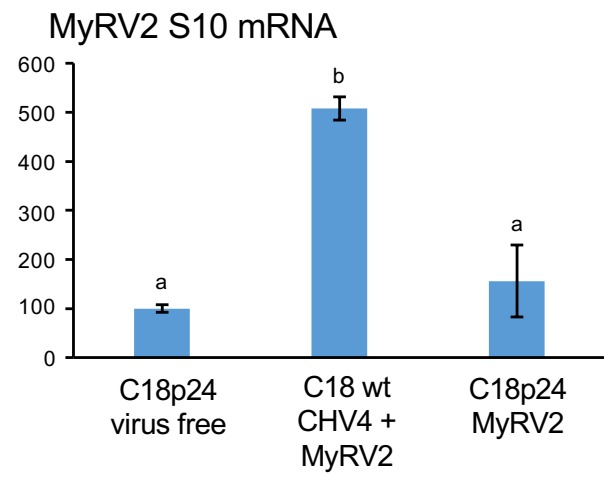

**Supplementary Table S1.** List of primers used in the study

| Primer Name            | Sequence (5'-3')                             | Direction | Remarks                                        |
|------------------------|----------------------------------------------|-----------|------------------------------------------------|
| NotI C18DCL2Pro R      | GCATGCGCGGCCGCCTTGCAGCGTCGTACGACAGAT         | Reverse   | C18 <i>dcl2pro::egfp</i>                       |
| SalI C18DCL2Pro F      | CCCCCTGTCGACTGAGGAGGGTGGGGACAAAGGT           | Forward   |                                                |
| NotI eGFP F            | GTTAACGCGGCCGCATGGTGAGCAAGGGCGAGGAGC         | Forward   | C18 <i>dcl2pro::egfp</i> and <i>egfp</i> probe |
| SphI eGFP R            | AGGTCAGCATGCTTACTTGTACAGCTCGTCCATG           | Reverse   |                                                |
| CHV4-287 F             | ATGTCTGAGCAACAACATCATCT                      | Forward   | CHV4 RT-PCR                                    |
| CHV4-853 R             | TGCCATCCACCAGATGCCAGTT                       | Reverse   | CHV4 RT-PCR                                    |
| DCL2_4025_F            | CCTGCCCTGTTTCAGTATCA                         | Forward   | C18 <i>dcl2</i> KO                             |
| DCL2_4545_R            | GTGGTAGCCCTCTCTTTGAC                         | Reverse   | C18 <i>dcl2</i> KO                             |
| pCold-I-KpnI-CHV4P52_F | CCCATATGGAGCTCGGTACCATGTCTGAGCAACAACATCATCTA | Forward   | CHV4 protease cleavage assay                   |
| pCold_NdeI-CHV4-p52_F  | ATATCGAAGGTAGGCATATGTCTGAGCAACAACATCATCTA    | Reverse   | CHV4 protease cleavage assay                   |
| pCPXHY3-HpaI-CHV4p24_F | ACGCGGCCAAGCTTGTTAACATGTCTGAGCAACAACATCATCTA | Reverse   | C18 p24                                        |
| pCPXHY3-HpaI-CHV4P24_R | ATGCGCGGCCGCGTTAACCCAAGGCGTGACGCTTTGTC       | Reverse   | C18 p24                                        |
| MyRV2-E2-10_300_F      | AATTCAATTCCGCGCGAAGGGG                       | Forward   | MyRV2 S10 probe                                |
| MyRV2-E2-10_1200_R     | TTCATTTTTCACGTTGTAAAAAC                      | Reverse   | MyRV2 S10 probe                                |
| 5'UTR_CHV1_F           | GATAATTTTGGTTGCTGCAC                         | Forward   | CHV1- $\Delta$ p69 RT-PCR and probe            |
| 5'UTR_CHV1_R           | GACTCATGTGGCGACGTGCC                         | Reverse   | CHV1- $\Delta$ p69 RT-PCR and probe            |
