# Supplementary figures and images for: Identification of an RNA Silencing Suppressor Encoded by a Symptomless Fungal Hypovirus, Cryphonectria Hypovirus 4
Source: MDPI journal article supplement (doi:10.3390/biology10020100), 2021-01-31

Figure 1C

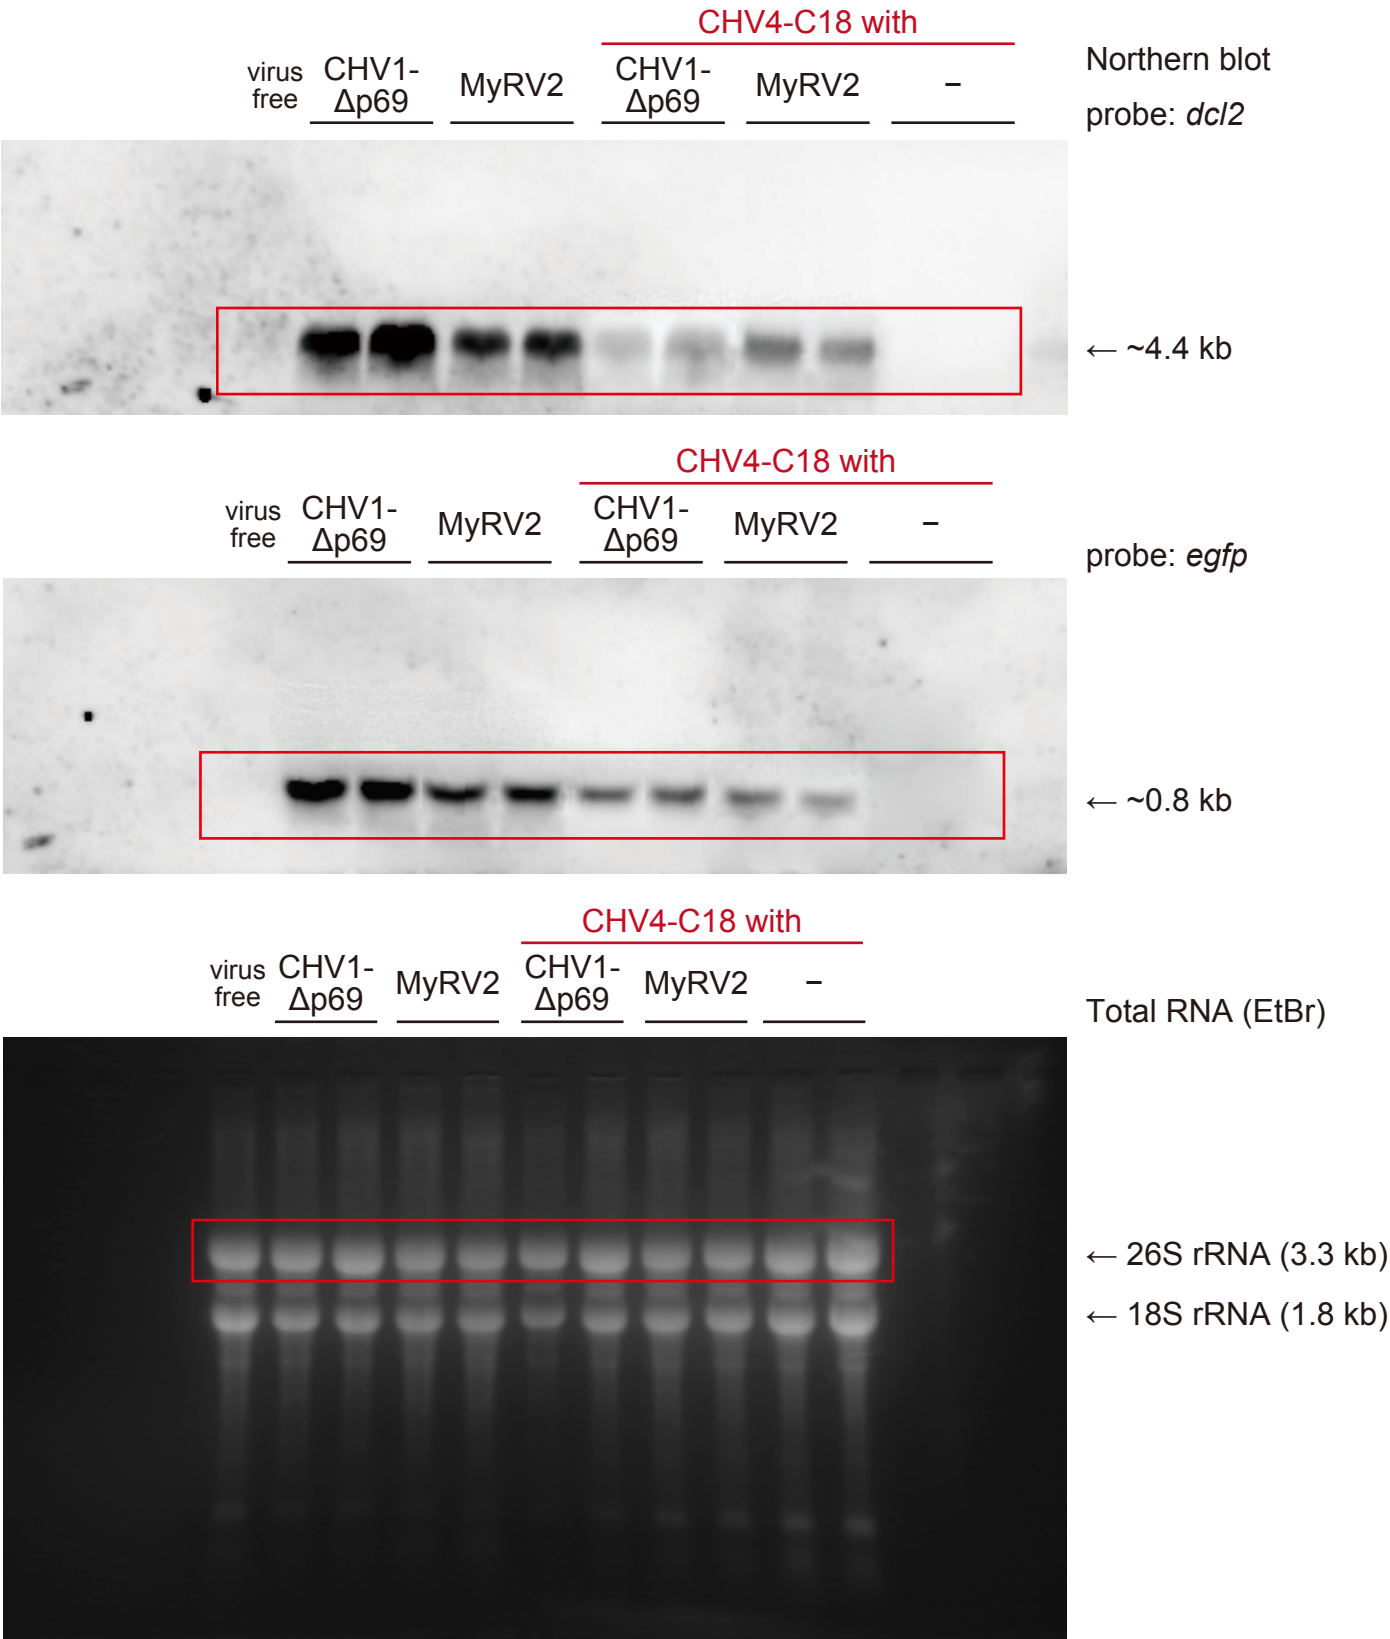

Figure 4

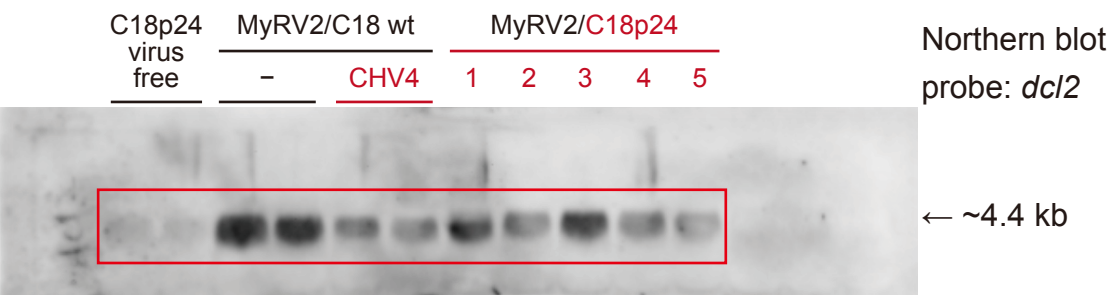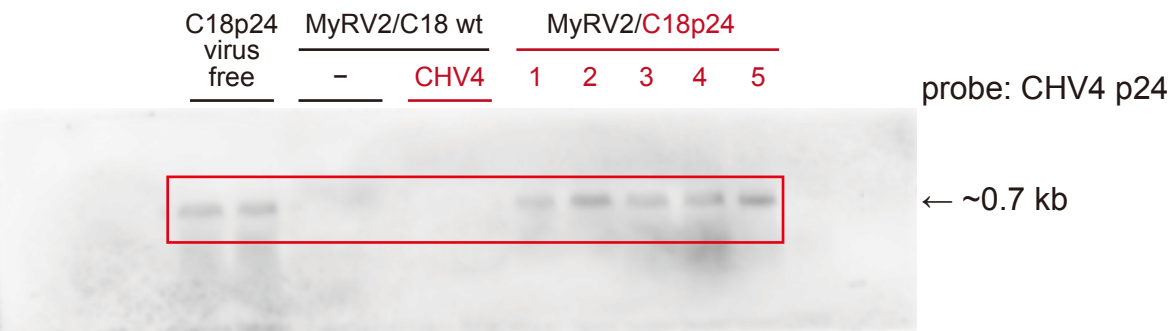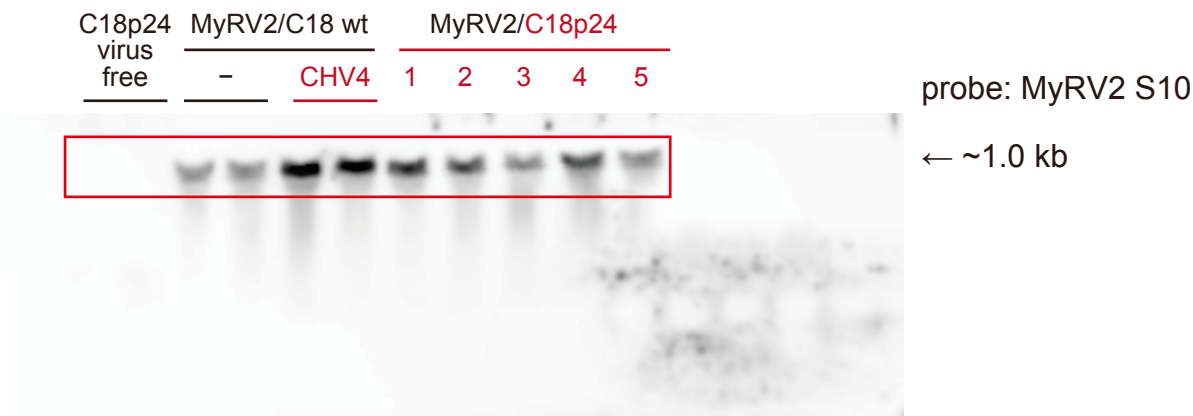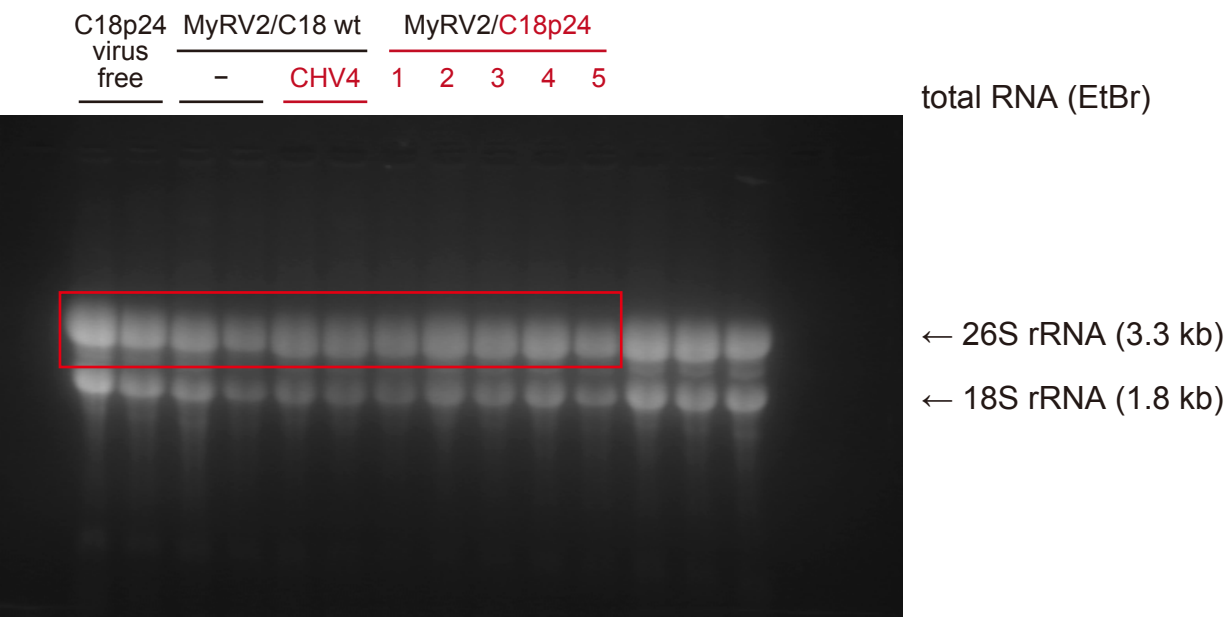

Supplement: s1 [file s1]
